# Supplementary material for: Disease Prediction Models and Operational Readiness
Source: PubMed Central journal article supplement (PMC3960139; doi:10.1371/journal.pone.0091989), 2014-03-19

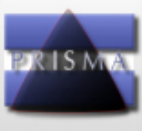

# PRISMA 2009 Flow Diagram

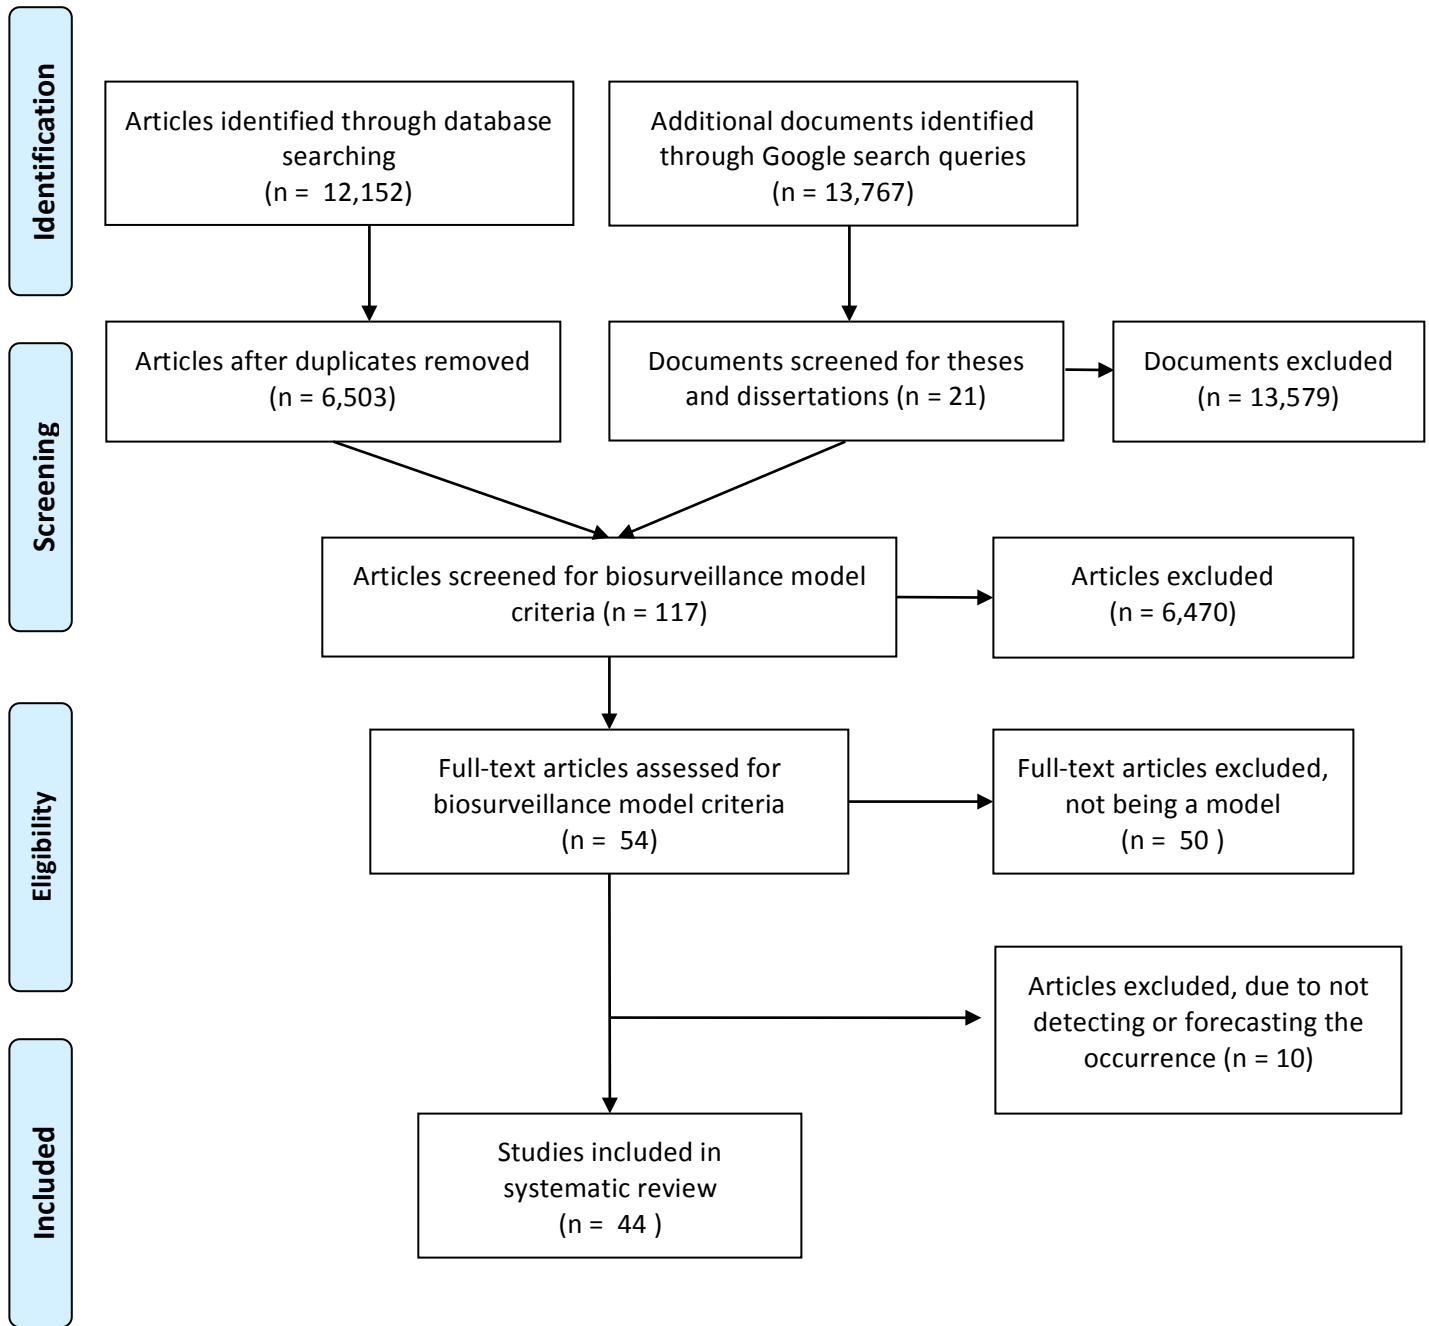

Supplement: pone.0091989.s001.pdf [file pone.0091989.s001.pdf]
